# Supplementary material for: A Novel Patent Ductus Arteriosus Severity Score to Predict Clinical Outcomes in Premature Neonates
Source: MDPI journal article supplement (doi:10.3390/jcdd9040114), 2022-04-12
Supplement: s1 [file s1]

**Table S1.** Univariate Analysis involving gestational age and all echocardiography variables to predict Chronic Lung Disease.

| Predictor Variables         | No CLD/Death | CLD/Death    | P value |
|-----------------------------|--------------|--------------|---------|
| Gestational Age (wk)        | 29.74±1.61   | 27.39±1.44   | <0.001  |
| PPI (L/min/m <sup>2</sup> ) | 3.12±1.25    | 6.15±1.85    | <0.001  |
| PDA diameter                | 1.92±0.48    | 2.42±0.42    | <0.001  |
| PDA Vmax                    | 1.78±0.33    | 1.37±0.26    | 0.002   |
| LVO (mL/kg/min)             | 206.26±53.08 | 292.52±93.41 | 0.01    |
| Celiac Artery VTI (cm)      | 11.30±3.00   | 6.50±1.69    | <0.001  |
| SMA VTI (cm)                | 5.61±1.67    | 4.37±1.72    | 0.002   |
| LV a' (cm/s)                | 7.57±2.85    | 6.28±1.74    | 0.07    |
| PV Vd (m/s)                 | 0.49±0.17    | 0.56±0.14    | 0.04    |
| LA:Ao ratio                 | 1.44±0.19    | 1.52±0.16    | 0.03    |
| MV E:A ratio                | 0.79±0.12    | 0.83±0.11    | 0.09    |
| DFR (%)                     | 12.08±8.97   | 23.00±6.97   | <0.001  |
